# Supplementary material for: Evolutionary Origin and Methylation Status of Human Intronic CpG Islands that Are Not Present in Mouse
Source: PubMed Central journal article supplement — Genome Biol Evol. 2014 Jun 12;6(7):1579–88. doi: 10.1093/gbe/evu125 (PMC4122923; doi:10.1093/gbe/evu125), 2014-06-12
Supplement: supp_evu125_supplement.pdf [file supp_evu125_supplement.pdf]

**Figure S1:** Possible location of a CGI with regard to the CCDS.

**Figures S2-S29:** Histograms of read methylation of all 14 candidate CGIs (both methylomes).

**Figures S30-S34:** IGV screen shots of the five CGIs studied in detail (methylome 1).

**Table S4:** Primer sequences.

**Table S5.1-S5.3:** Deep bisulfite methylation analysis in monocyte DNA samples from heterozygous individuals (*ASRGL1*, *PARP11*, *PDXDC1*)

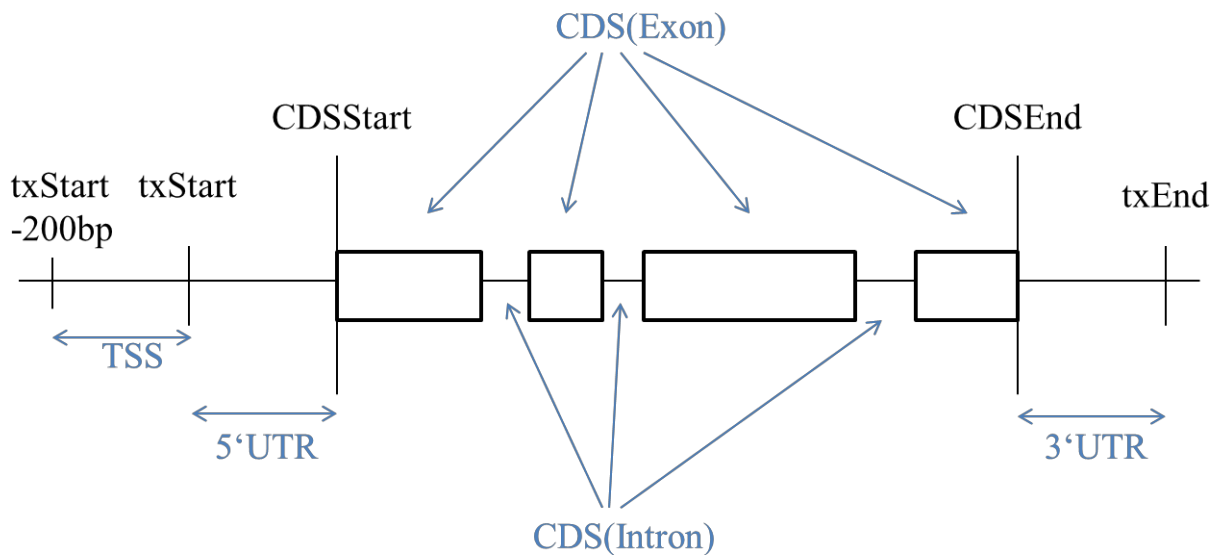

**Fig. S1:** Possible location of a CGI with regard to the CCDS. In black, a schematic view of a CCDS containing transcription start (txStart), start of the CDS (CDSStart), end of the CDS (CDSend) and the transcription end (txEnd). Five classes for CGI characterisation are defined, where a CGI can overlap no, one or more classes. The classes are (visualised in blue): TSS (the 200 bp region upstream of the transcription start site), 5'UTR, CDS(Exon), CDS(Intron) and 3'UTR.

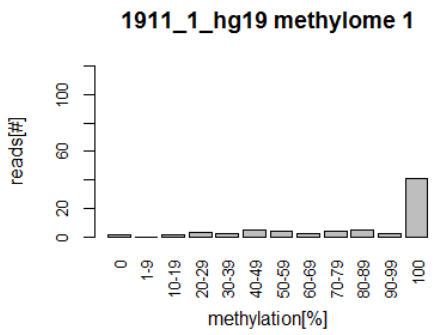

**Fig. S2:** Read methylation 1911\_1\_hg19 (methylome 1)

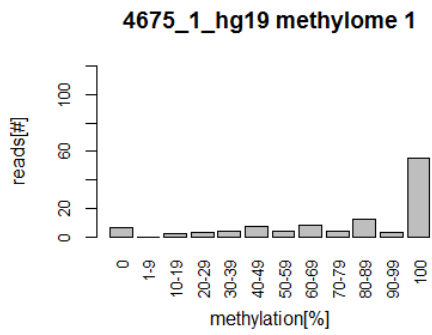

**Fig. S3:** Read methylation 4675\_1\_hg19 (methylome 1)

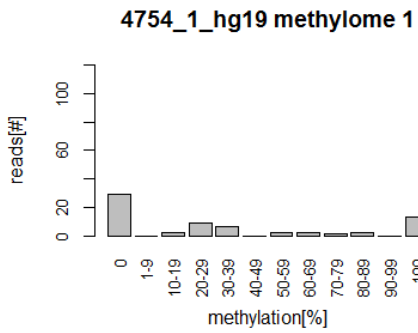

**Fig. S4:** Read methylation 4754\_1\_hg19 (methylome 1)

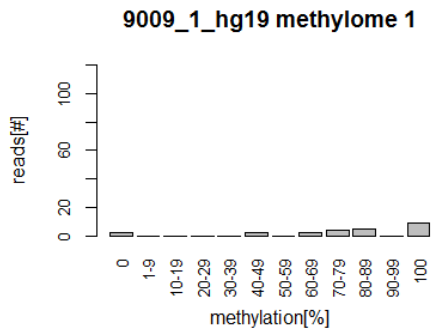

**Fig. S5:** Read methylation 9009\_1\_hg19 (methylome 1)

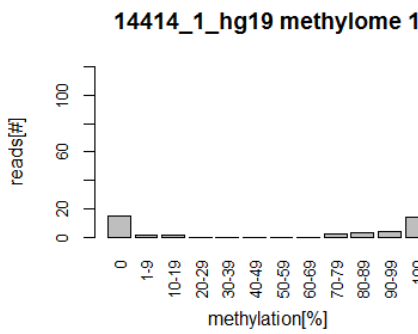

**Fig. S6:** Read methylation 14414\_1\_hg19 (methylome 1)

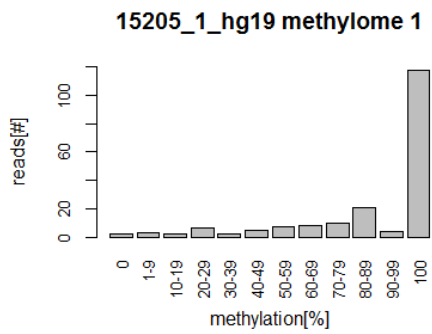

**Fig. S7:** Read methylation 15205\_1\_hg19 (methylome 1)

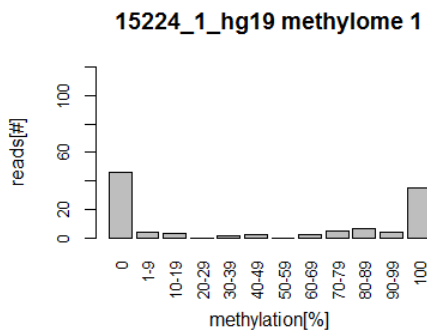

**Fig. S8:** Read methylation 15224\_1\_hg19 (methylome 1)

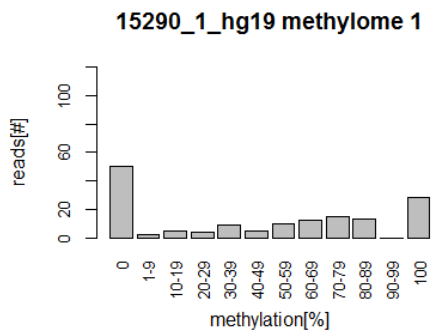

**Fig. S9:** Read methylation 15290\_1\_hg19 (methylome 1)

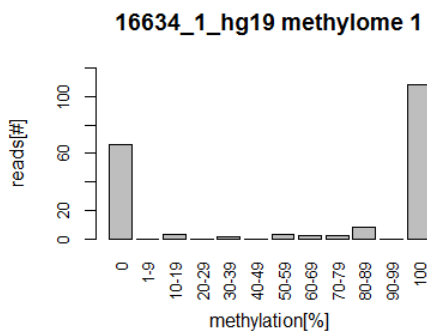

**Fig. S10:** Read methylation 16634\_1\_hg19 (methylome 1)

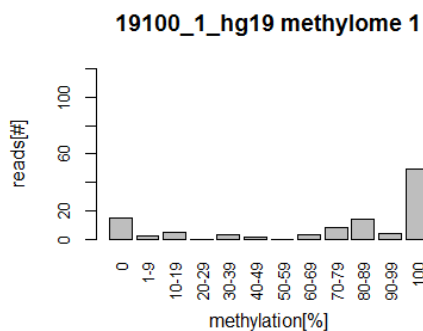

**Fig. S11:** Read methylation 19100\_1\_hg19 (methylome 1)

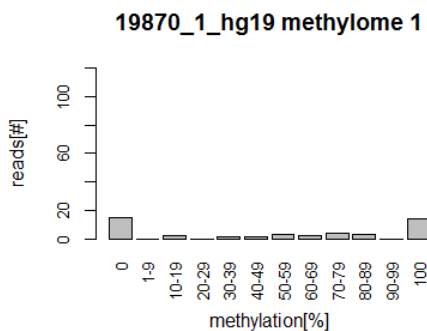

**Fig. S12:** Read methylation 19870\_1\_hg19 (methylome 1)

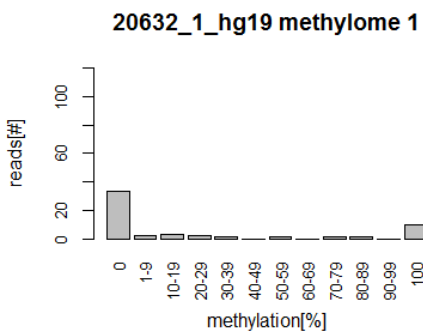

**Fig. S13:** Read methylation 20632\_1\_hg19 (methylome 1)

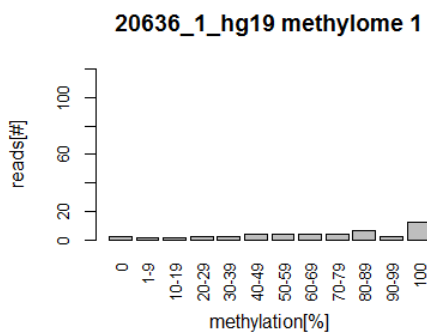

**Fig. S14:** Read methylation 20636\_1\_hg19 (methylome 1)

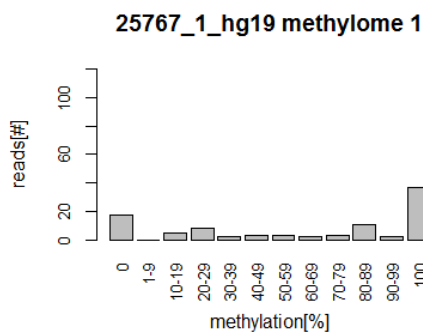

**Fig. S15:** Read methylation 25767\_1\_hg19 (methylome 1)

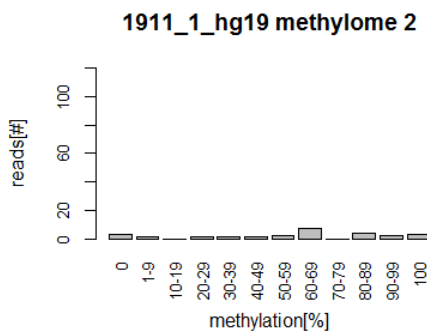

**Fig. S16:** Read methylation 1911\_1\_hg19 (methylome 2)

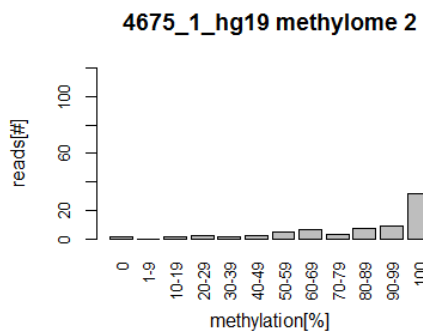

**Fig. S17:** Read methylation 4675\_1\_hg19 (methylome 2)

4754\_1\_hg19 methylome 2

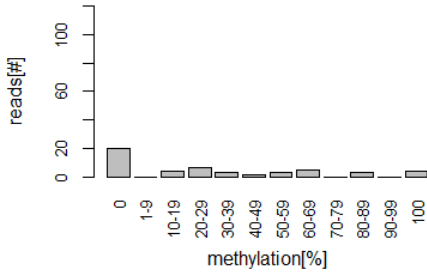

Fig. S18: Read methylation 4754\_1\_hg19 (methylome 2)

9009\_1\_hg19 methylome 2

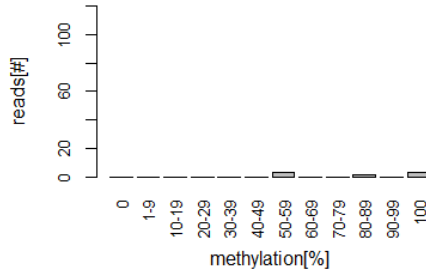

Fig. S19: Read methylation 9009\_1\_hg19 (methylome 2)

14414\_1\_hg19 methylome 2

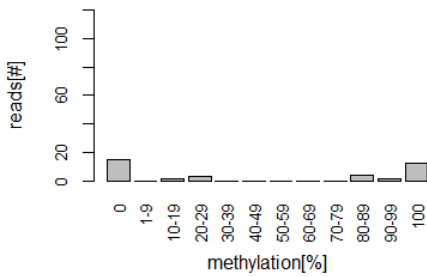

Fig. S20: Read methylation 14414\_1\_hg19 (methylome 2)

15205\_1\_hg19 methylome 2

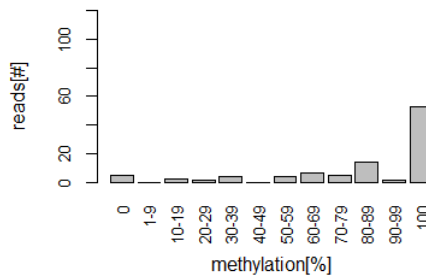

Fig. S21: Read methylation 15205\_1\_hg19 (methylome 2)

15224\_1\_hg19 methylome 2

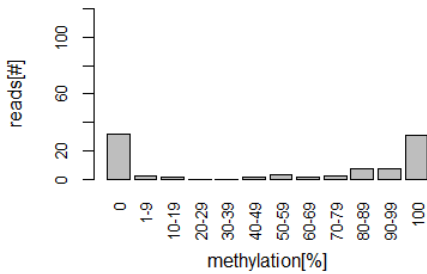

Fig. S22: Read methylation 15224\_1\_hg19 (methylome 2)

15290\_1\_hg19 methylome 2

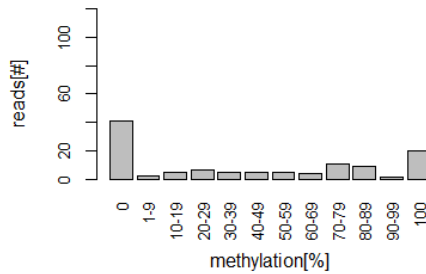

Fig. S23: Read methylation 15290\_1\_hg19 (methylome 2)

16634\_1\_hg19 methylome 2

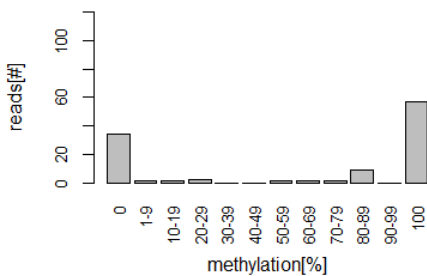

Fig. S24: Read methylation 16634\_1\_hg19 (methylome 2)

19100\_1\_hg19 methylome 2

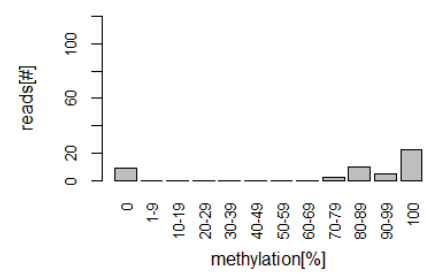

Fig. S25: Read methylation 19100\_1\_hg19 (methylome 2)

19870\_1\_hg19 methylome 2

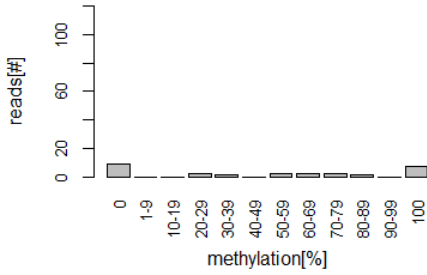

Fig. S26: Read methylation 19870\_1\_hg19 (methylome 2)

20632\_1\_hg19 methylome 2

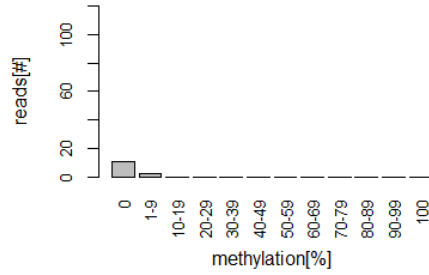

Fig. S27: Read methylation 20632\_1\_hg19 (methylome 2)

20636\_1\_hg19 methylome 2

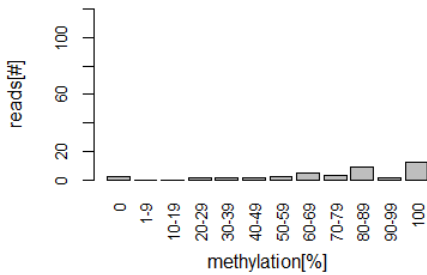

Fig. S28: Read methylation 20636\_1\_hg19 (methylome 2)

25767\_1\_hg19 methylome 2

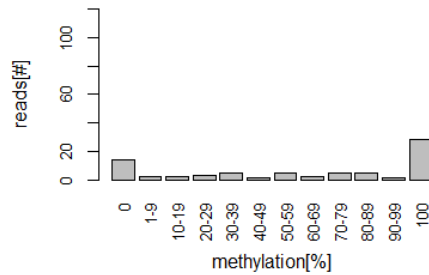

Fig. S29: Read methylation 25767\_1\_hg19 (methylome 2)

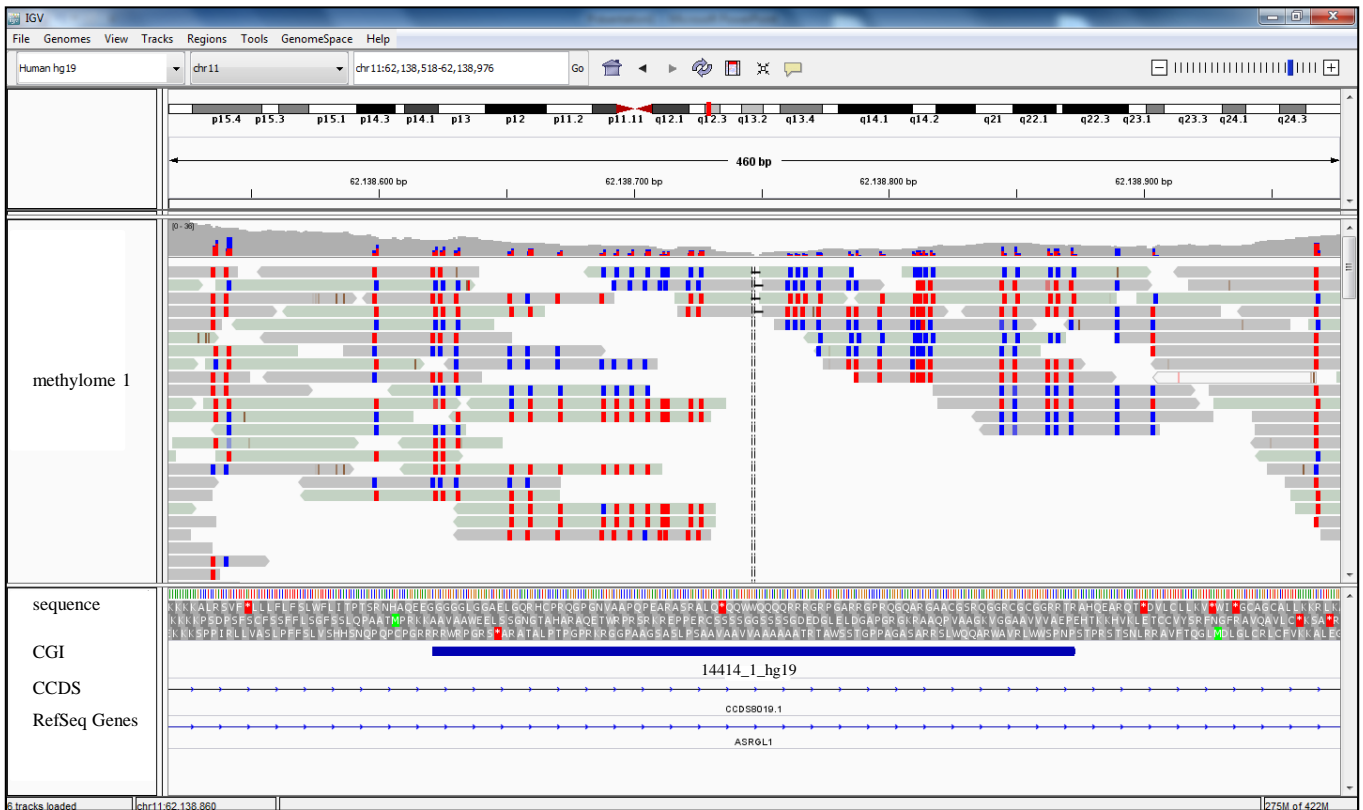

Fig. S30: Screenshot IGV Browser of CGI 14414\_1\_hg19 (*ASRGL1*)

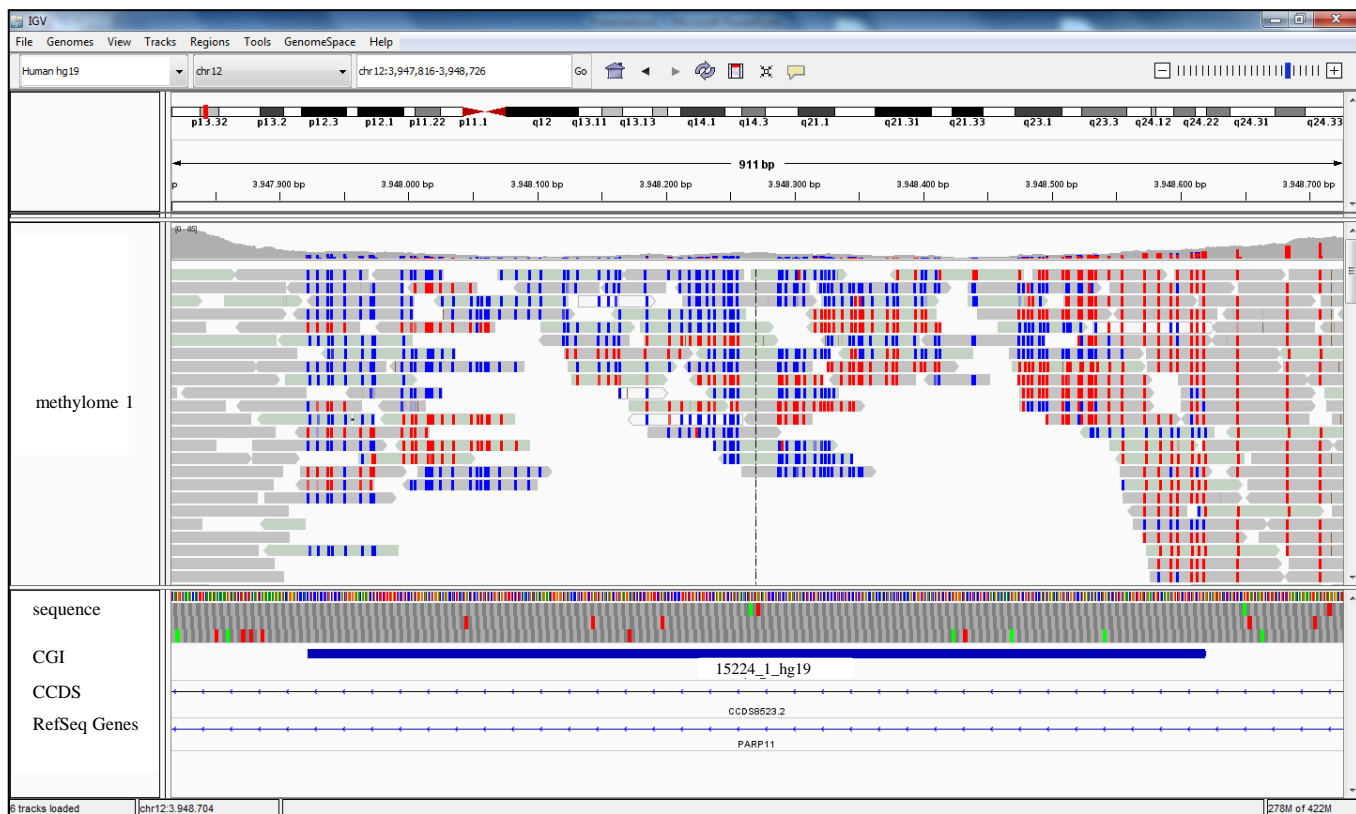

**Fig. S31:** Screenshot IGV Browser of CGI 15224\_1\_hg19 (*PARP11*)

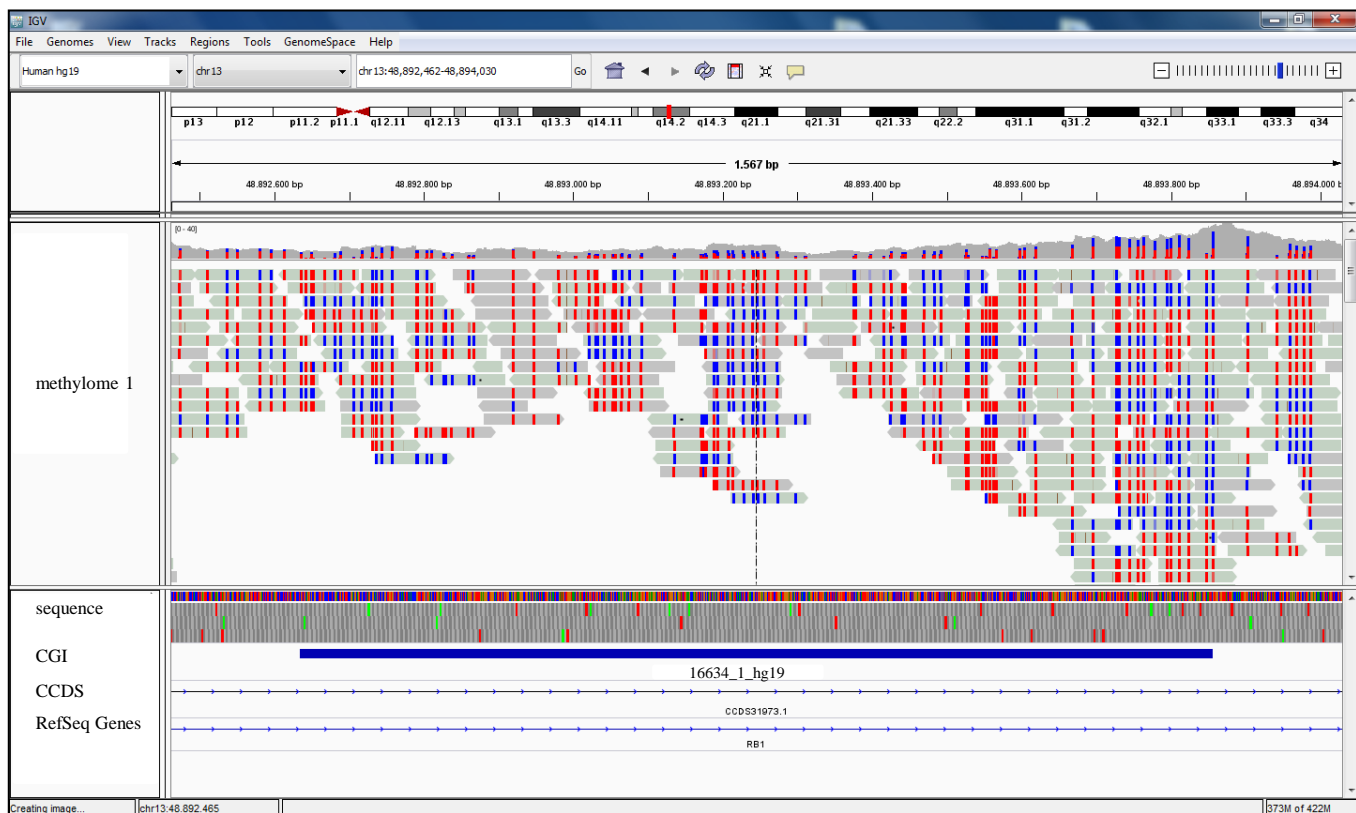

**Fig. S32:** Screenshot IGV Browser of CGI 16634\_1\_hg19 (*RBI*)

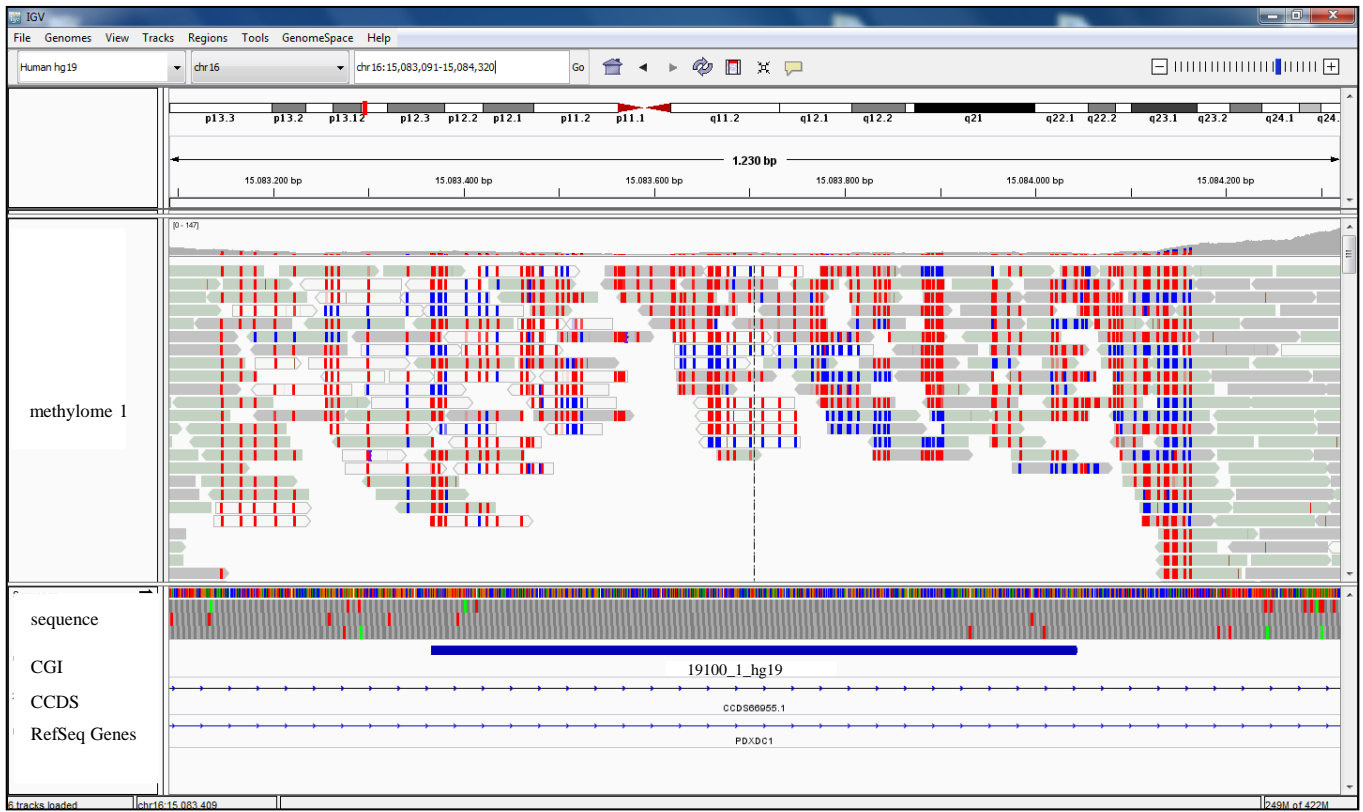

Fig. S33: Screenshot IGV Browser of CGI 19100\_1\_hg19 (*PDXDC1*)

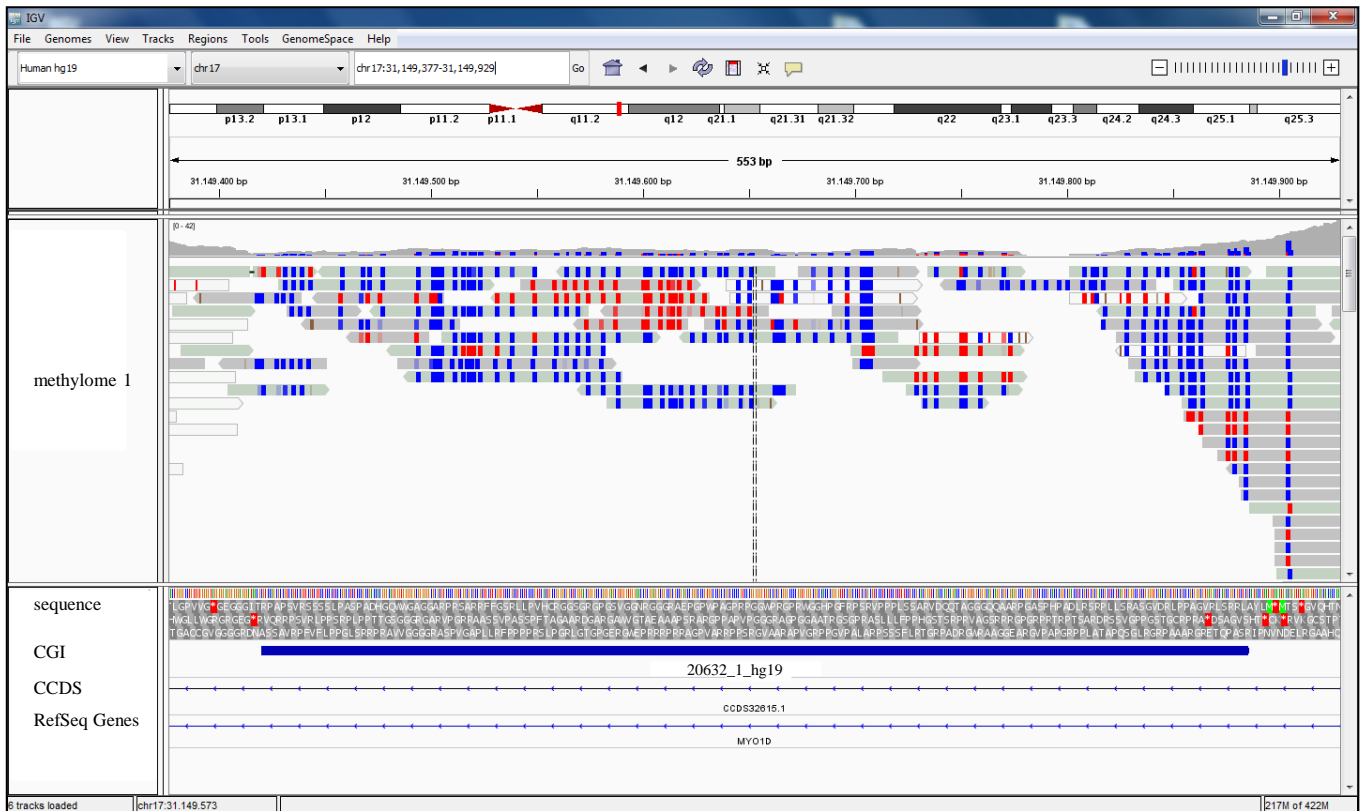

Fig. S34: Screenshot IGV Browser of CGI 20632\_1\_hg19 (*MYO1D*)

**Table S4:** Primer sequences.

| Primer name                                               | Primer sequence (5'-3')                           | T <sub>m</sub> (°C) | Product size (bp) |
|-----------------------------------------------------------|---------------------------------------------------|---------------------|-------------------|
| <b>Genomic sequence analysis</b>                          |                                                   |                     |                   |
| PDXDC1-CpG69-F                                            | TGCACGAAGGGCACAAAGTC                              | 68                  | 382               |
| PDXDC1-CpG69-R                                            | CGATGTGGCTACAGCAGG                                |                     |                   |
| PARP11-CpG88-F2                                           | CTGGCCATGTGGGGCTAG                                | 64                  | 353               |
| PARP11-CpG88-R                                            | ACCCATTCCTGTGGATTTTC                              |                     |                   |
| ASRGL1-CpG28-F                                            | TCAAAAAGCTCCCCTTTGAC                              | 64                  | 516               |
| ASRGL1-CpG28-R3                                           | CTGGTTTCTCATCACTCCAA                              |                     |                   |
| <b>Deep bisulfite sequencing (universal tags in bold)</b> |                                                   |                     |                   |
| PDXDC1-CpG69-Ftag                                         | <b>CTTGCTTCCTGGCACGAG</b> GTGTAYGAAGGGTATAAAAGTT  | 50                  | 421               |
| PDXDC1-CpG69-RM13                                         | <b>CAGGAAACAGCTATGACCCCRATATAACTACAACAAAA</b>     |                     |                   |
| PARP11-CpG88-Ftag                                         | <b>CTTGCTTCCTGGCACGAG</b> TTGGTTATGTGGGGTTAGTTTT  | 56                  | 388               |
| PARP11-CpG88-RM13                                         | <b>CAGGAAACAGCTATGACACCCATTCCTATAAAATTTCCA</b>    |                     |                   |
| ASRGL1-CpG28-Ftag                                         | <b>CTTGCTTCCTGGCACGAG</b> TTTTTTGTATTTTGTGAGGAAGT | 56                  | 543               |
| ASRGL1-CpG28-RM13                                         | <b>CAGGAAACAGCTATGACCTCTAATTTCTCATCACTCCAA</b>    |                     |                   |



**Table S5.1:** Methylation levels in heterozygous monocyte samples for *ASRGL1*

| <i>ASRGL1</i> |          |                   |          |          |
|---------------|----------|-------------------|----------|----------|
| sample        | genotype | methylation level |          |          |
|               |          | total             | allele G | allele A |
| R2            | A/G      | 90%               | 93%      | 79%      |
| R4            | A/G      | 93%               | 93%      | 94%      |
| R6            | A/G      | 96%               | 96%      | 97%      |
| R8            | A/G      | 90%               | 92%      | 86%      |
| R10           | A/G      | 88%               | 85%      | 91%      |
| R11           | A/G      | 78%               | 77%      | 82%      |
| R14           | A/G      | 95%               | 94%      | 97%      |
| R15           | A/G      | 78%               | 36%      | 93%      |
| R17           | A/G      | 93%               | 93%      | 94%      |
| P1            | A/G      | 76%               | 73%      | 78%      |
| P2            | A/G      | 73%               | 54%      | 90%      |
| P3            | A/G      | 90%               | 82%      | 93%      |
| K1            | A/G      | 75%               | 63%      | 92%      |
| K2            | A/G      | 90%               | 89%      | 91%      |

**Table S5.2:** Methylation levels in heterozygous monocyte samples for *PARP11*

| <i>PARP11</i> |          |                   |          |          |
|---------------|----------|-------------------|----------|----------|
| sample        | genotype | methylation level |          |          |
|               |          | total             | allele G | allele A |
| R1            | A/G      | 83%               | 84%      | 83%      |
| R2            | A/G      | 68%               | 75%      | 59%      |
| R3            | A/G      | 79%               | 81%      | 77%      |
| R4            | A/G      | 80%               | 81%      | 78%      |
| R7            | A/G      | 72%               | 71%      | 73%      |
| R9            | A/G      | 70%               | 74%      | 65%      |
| R10           | A/G      | 84%               | 82%      | 87%      |
| R11           | A/G      | 74%               | 73%      | 75%      |
| R13           | A/G      | 76%               | 71%      | 79%      |
| R16           | A/G      | 80%               | 80%      | 79%      |
| K1            | A/G      | 73%               | 73%      | 72%      |
| K2            | A/G      | 72%               | 73%      | 72%      |

**Table S5.3:** Methylation levels in heterozygous monocyte samples for *PDXDC1*

| <i>PDXDC1</i> |          |                   |          |          |
|---------------|----------|-------------------|----------|----------|
| sample        | genotype | methylation level |          |          |
|               |          | total             | allele A | allele C |
| R1            | A/C      | 68%               | 91%      | 4%       |
| R2            | A/C      | 61%               | 66%      | 57%      |
| R3            | A/C      | 70%               | 87%      | 55%      |
| R6            | A/C      | 61%               | 75%      | 15%      |
| R7            | A/C      | 54%               | 77%      | 61%      |
| R8            | A/C      | 73%               | 77%      | 62%      |
| R9            | A/C      | 55%               | 90%      | 31%      |
| R10           | A/C      | 80%               | 90%      | 71%      |
| R11           | A/C      | 69%               | 79%      | 48%      |
| R13           | A/C      | 61%               | 90%      | 42%      |
| R14           | A/C      | 77%               | 70%      | 83%      |
| R17           | A/C      | 76%               | 90%      | 63%      |
| K1            | A/C      | 59%               | 87%      | 28%      |
| K2            | A/C      | 53%               | 90%      | 19%      |
